# Supplementary material for: Morphological changes in hooded crows (Corvus cornix) related to urbanization
Source: Frontiers journal article supplement (doi:10.3389/fevo.2023.1196075), 2023-10-10
Supplement: Data_Sheet_1.pdf [file Data_Sheet_1.pdf]

## Supplementary material

to accompany  
“Morphological adaptations of Hooded Crows (*Corvus cornix*) to urbanization”  
by Benmazouz et al.

### Contents

Figure S1 – Interaction plots of body size variables in Analysis 2

Figure S2 – Mean annual temperature in the four study areas

Figure S3 – Aerial view of the ZOO, SPC and OST areas and trapping locations in Debrecen

Figure S1

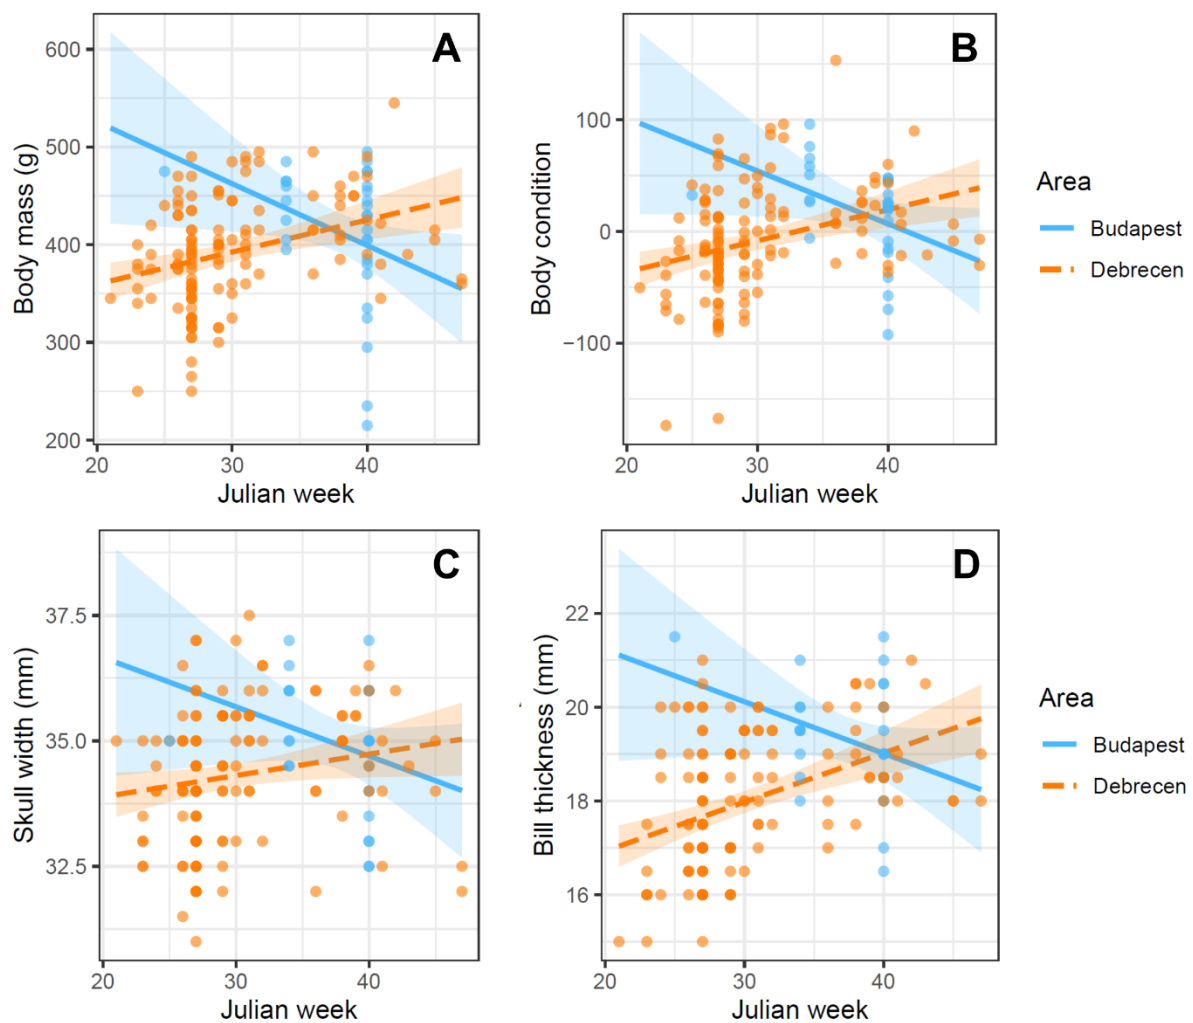

**Figure S1.** Interaction plots for seasonal differences in body mass (A), body condition (B), skull width (C) and bill thickness (D) of juvenile Hooded Crows from two cities (Budapest, Debrecen).

Figure S2

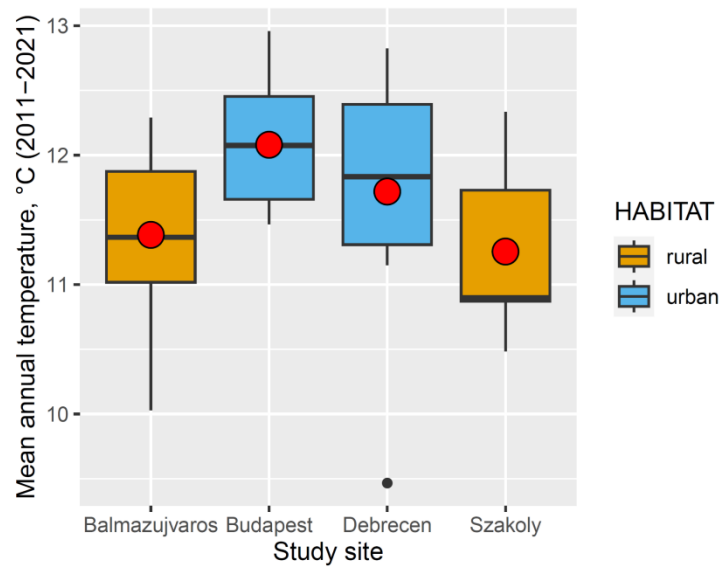

**Figure S2.** Mean annual temperature between 2011 and 2021 in the four study areas. The plot depicts the median (thick horizontal line), 25% and 75% quartiles (box), min and max values (whiskers) and mean values (red dots).

Figure S3

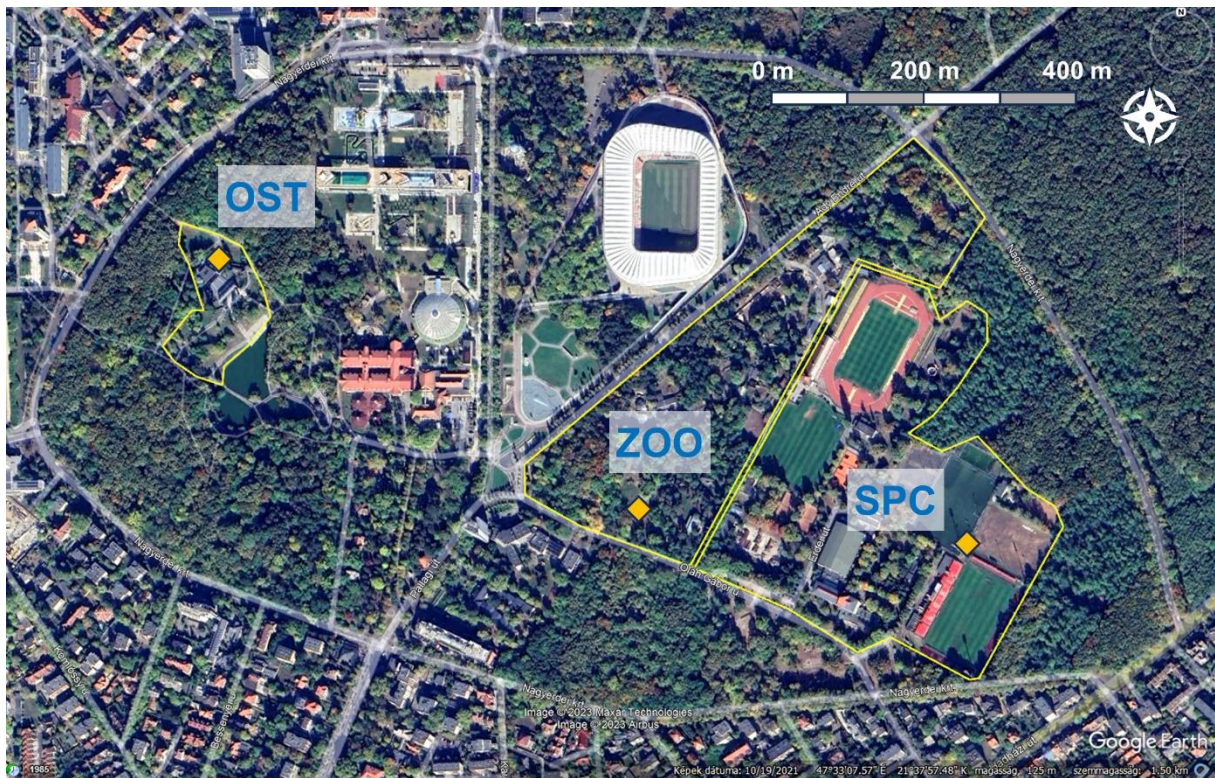

**Figure S3.** Aerial view of the OST, ZOO and SPC areas (yellow polygons) and trapping locations (orange diamonds) in Debrecen city. Source: Google Earth
